# Supplementary material for: Lenvatinib Exacerbates the Decrease in Skeletal Muscle Mass in Patients with Hepatocellular Carcinoma, Whereas Atezolizumab Plus Bevacizumab Does Not
Source: MDPI journal article supplement (doi:10.3390/cancers16020442), 2024-01-19
Supplement: s1 [file s1]

Table S1. The pre-, combination, and post-treatment results of the enrolled patients

|                    | AB group (n = 37) |                       |                | LEN group (n = 57) |                       |                |
|--------------------|-------------------|-----------------------|----------------|--------------------|-----------------------|----------------|
|                    | Pre-treatment     | Combination treatment | Post-treatment | Pre-treatment      | Combination treatment | Post-treatment |
| Any treatments     | 33 (89.2%)        | 4 (10.8%)             | 15 (40.5%)     | 51 (89.5%)         | 14 (24.6%)            | 28 (49.1%)     |
| Hepatectomy        | 20                | 0                     | 0              | 23                 | 0                     | 0              |
| RFA                | 17                | 1                     | 0              | 9                  | 2                     | 1              |
| TACE               | 21                | 3                     | 5              | 35                 | 12                    | 17             |
| Radiation therapy  | 6                 | 0                     | 2              | 16                 | 1                     | 2              |
| Other chemotherapy | 8                 | 0                     | 14             | 17                 | 0                     | 15             |

RFA, radiofrequency ablation; TACE, transcatheter arterial chemo embolization;
