# Supplementary material for: Lenvatinib Exacerbates the Decrease in Skeletal Muscle Mass in Patients with Hepatocellular Carcinoma, Whereas Atezolizumab Plus Bevacizumab Does Not
Source: MDPI journal article supplement (doi:10.3390/cancers16020442), 2024-01-19
Supplement: s1 [file s1]

Table S2. Changes in body composition during initial treatment and the introduction of AB or LEN treatment

|                                         | AB group (n = 37) |                    |                | LEN group (n = 57) |                     |                |
|-----------------------------------------|-------------------|--------------------|----------------|--------------------|---------------------|----------------|
|                                         | Initial treatment | Introduction of AB | <i>p</i> value | Initial treatment  | Introduction of LEN | <i>p</i> value |
| SMI (cm <sup>2</sup> /m <sup>2</sup> )  | 43.2 (37.8–49.0)  | 42.9 (36.4–47.7)   | 0.777          | 45.0 (39.8–51.4)   | 46.5 (40.6–50.8)    | 0.931          |
| SATI (cm <sup>2</sup> /m <sup>2</sup> ) | 50.0 (26.2–73.2)  | 42.8 (30.4–53.8)   | 0.119          | 47.1 (26.0–59.0)   | 52.1 (27.9–67.6)    | 0.164          |
| VATI (cm <sup>2</sup> /m <sup>2</sup> ) | 44.7 (27.6–60.8)  | 54.7 (36.1–67.2)   | 0.002          | 47.0 (27.4–65.4)   | 48.8 (29.0–64.2)    | 0.891          |

Continuous covariates are presented as medians (interquartile range). AB, atezolizumab plus bevacizumab; LEN, Lenvatinib; SMI, skeletal muscle index; SATI, subcutaneous adipose tissue index; VATI, visceral adipose tissue index;
