# Supplementary figures and images for: Lenvatinib Exacerbates the Decrease in Skeletal Muscle Mass in Patients with Hepatocellular Carcinoma, Whereas Atezolizumab Plus Bevacizumab Does Not
Source: MDPI journal article supplement (doi:10.3390/cancers16020442), 2024-01-19

Figure S1

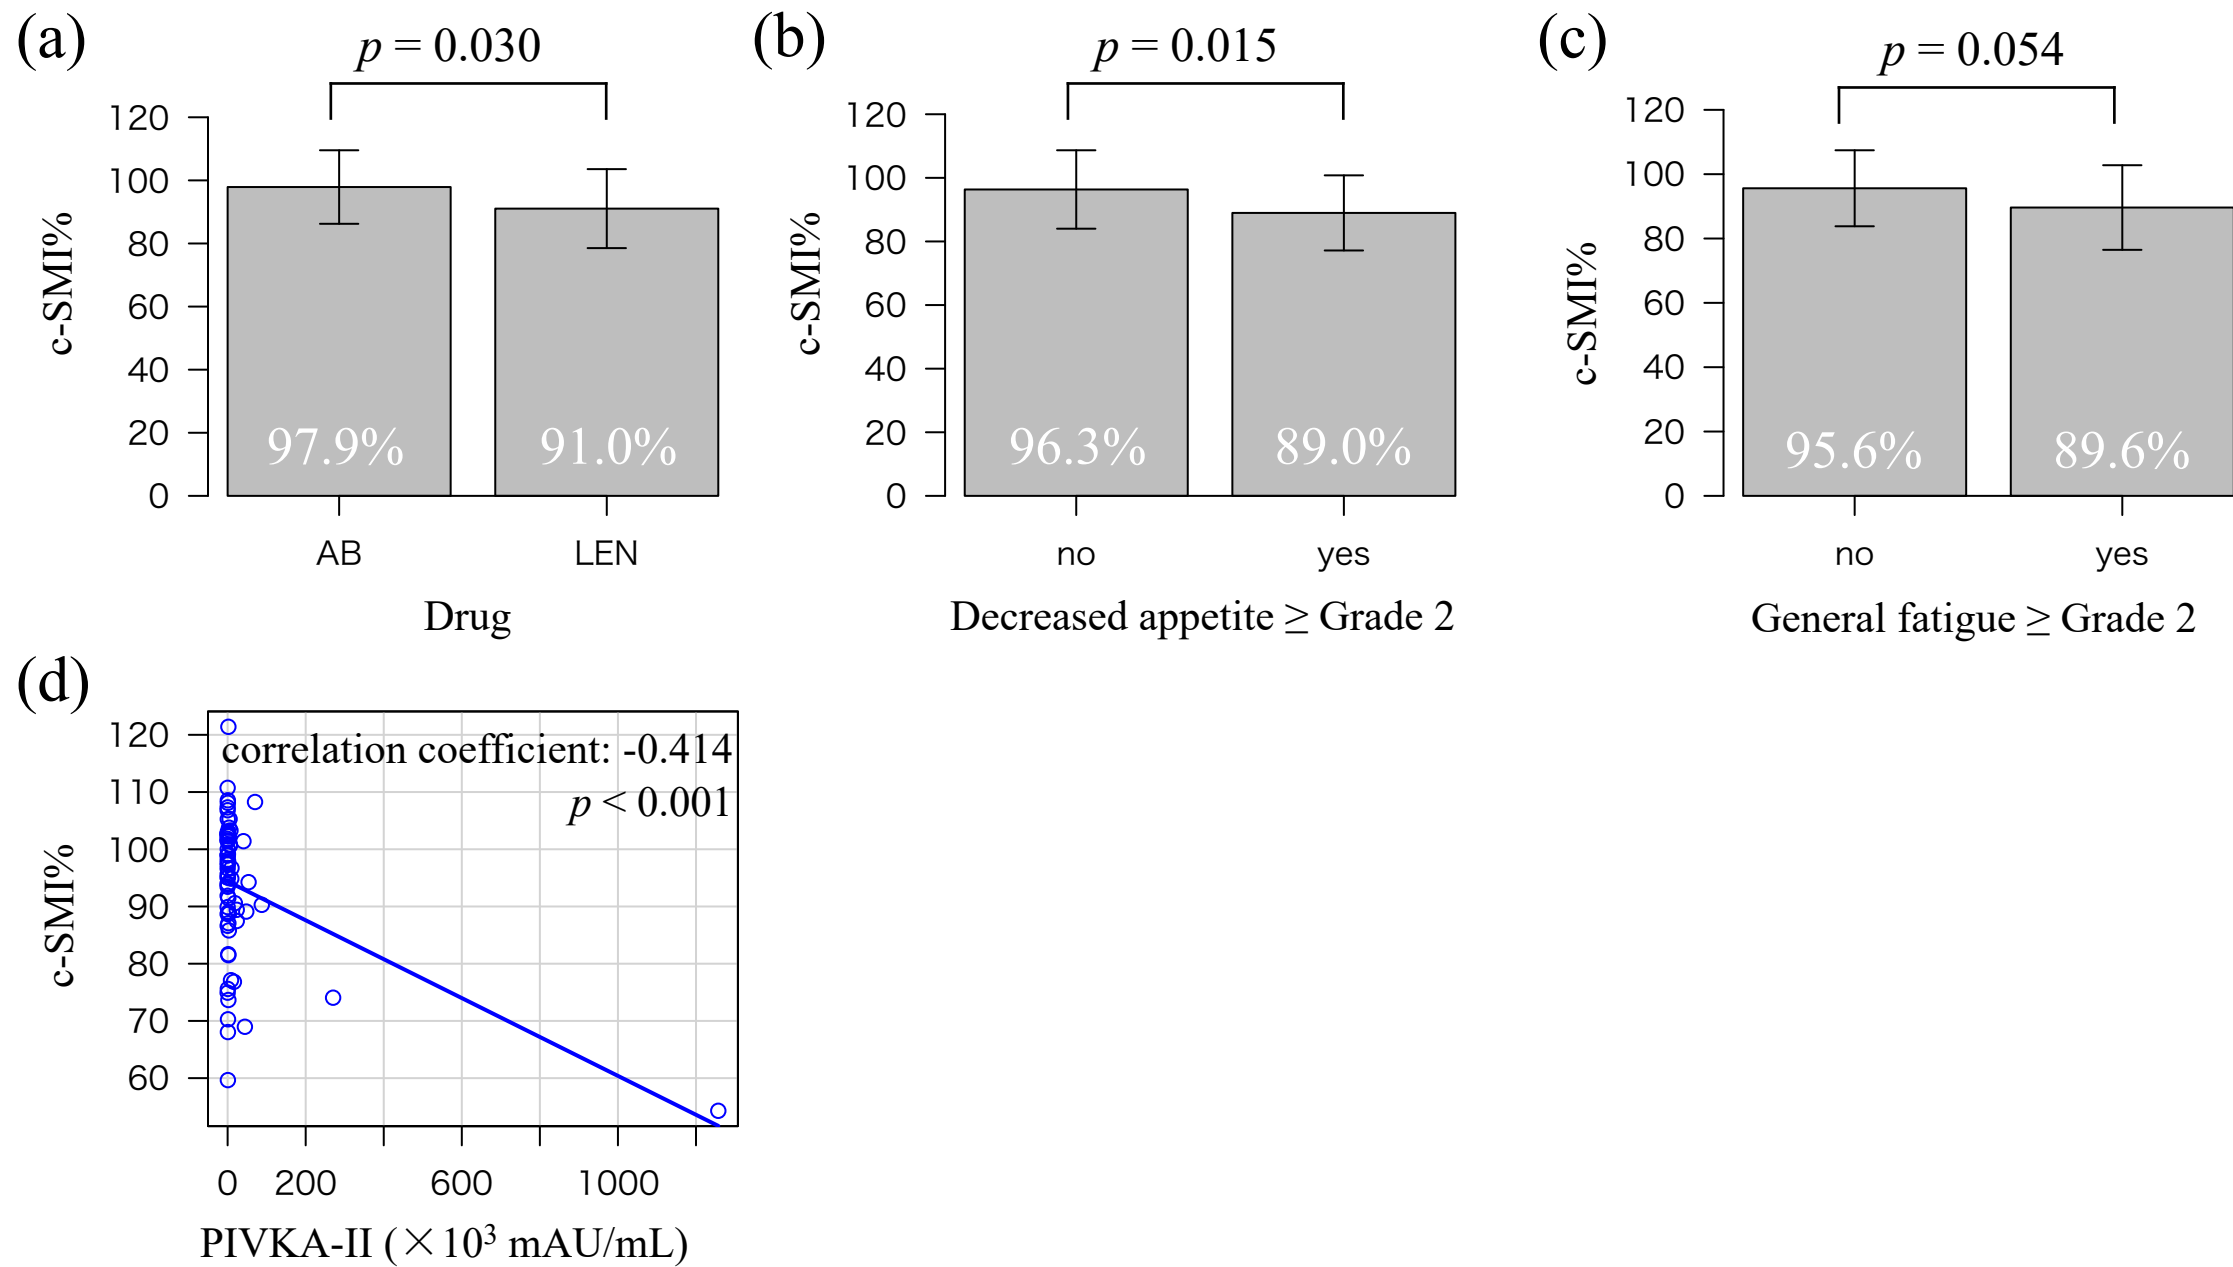

Supplement: s1 [file s1]
